# Supplementary material
Source: Springer Nature journal article supplement (https://www.springermedizin.de/resource/supplementary/12888_2012_1017_MOESM5_ESM.pdf/9479626)
Supplement: MOESM5 [file 9479626]

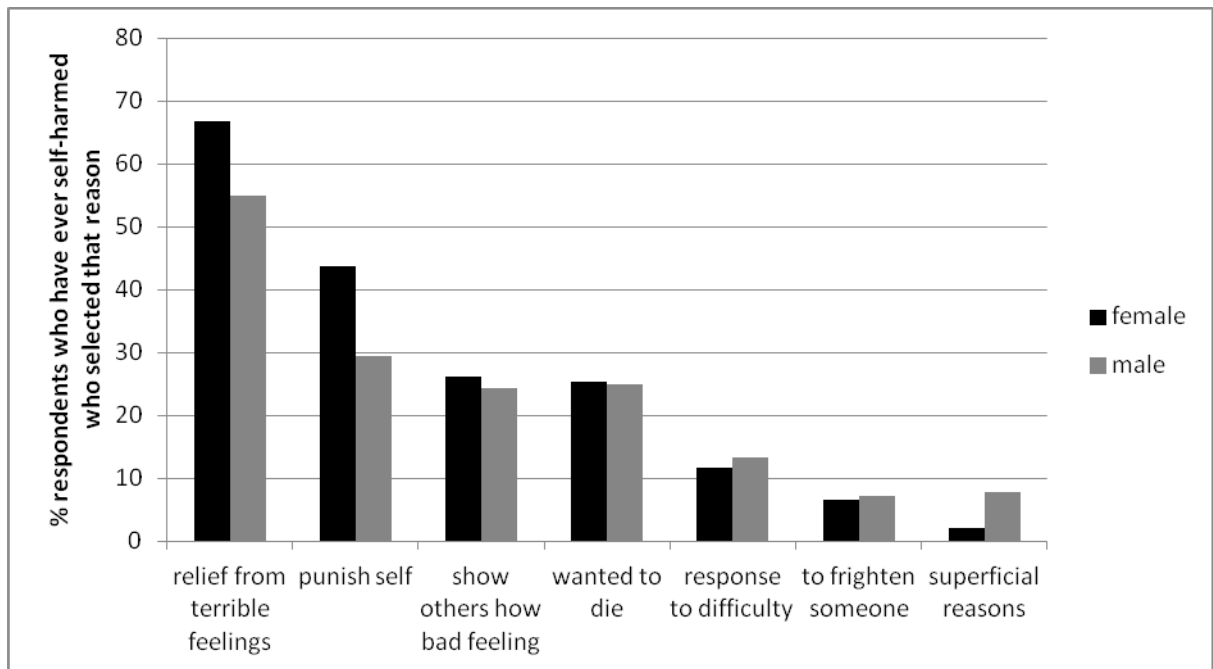

*Notes*

1. Reasons selected by 1% or less respondents are not shown, but include to feel in control, to feel alive, to see the blood and don't know.
2. Respondents were invited to tick all that applied.
